# Supplementary material
Source: PubMed Central journal article supplement (PMC6341183)

**Supplemental table 1**

| Characteristics           | Entire cohort (n = 112) | No. (%) |
|---------------------------|-------------------------|---------|
| Age                       |                         |         |
| >60 years                 | 55                      | (49)    |
| Gender                    |                         |         |
| Male                      | 74                      | (66)    |
| Histology                 |                         |         |
| PTCL-NOS                  | 40                      | (36)    |
| AITL                      | 49                      | (44)    |
| ALCL, ALK-                | 23                      | (20)    |
| Ann Arbor stage           |                         |         |
| I or II                   | 13                      | (12)    |
| III or IV                 | 99                      | (88)    |
| Performance status (ECOG) |                         |         |
| 0-1                       | 79                      | (71)    |
| 2-3                       | 32                      | (29)    |
| NA                        | 1                       |         |
| Bone marrow involvement   |                         |         |
| Yes                       | 31                      | (28)    |
| LDH                       |                         |         |
| Normal                    | 56                      | (50)    |
| High                      | 52                      | (46)    |
| NA                        | 4                       | (4)     |
| IPI                       |                         |         |
| 0-3                       | 91                      | (81)    |
| 4-5                       | 21                      | (19)    |
| PIT                       |                         |         |
| 0-1                       | 60                      | (54)    |
| 2-4                       | 52                      | (46)    |
| Treatment                 |                         |         |
| CHOP/ICE                  | 41                      | (37)    |
| CHOEP                     | 25                      | (22)    |
| EPOCH                     | 1                       | (1)     |
| CHOP                      | 27                      | (24)    |
| Other                     | 18                      | (16)    |
| Transplant                |                         |         |
| Autologous                | 65                      | (58)    |
| Allogeneic                | 9                       | (8)     |
| None                      | 38                      | (34)    |

LDH: lactate dehydrogenase, IPI; international prognostic index, PIT: Prognostic index of T cell lymphoma, NA: not available

**Supplemental table 2, Additional models in multivariate analysis**

| <b>Model 1</b> |        |                |        |       |              |        |  |
|----------------|--------|----------------|--------|-------|--------------|--------|--|
| IPI            |        |                |        |       |              |        |  |
| >3             | 2.117  | 0.926 -4.842   | 0.076  | 1.735 | 0.878 -3.426 | 0.113  |  |
| ≤3             | 1      | (reference)    |        | 1     | (reference)  |        |  |
| Interim 5PS    |        |                |        |       |              |        |  |
| 4 or 5         | 10.616 | 4.216 -26.733  | <0.001 | 3.437 | 1.750 -6.750 | <0.001 |  |
| 1-3            | 1      | (reference)    |        | 1     | (reference)  |        |  |
| <b>Model 2</b> |        |                |        |       |              |        |  |
| PIT            |        |                |        |       |              |        |  |
| > 1            | 2.122  | 1.025 -4.394   | 0.043  | 1.711 | 0.964 -3.036 | 0.067  |  |
| ≤ 1            | 1      | (reference)    |        | 1     | (reference)  |        |  |
| Interim 5PS    |        |                |        |       |              |        |  |
| 4 or 5         | 10.277 | 4.073 -25.931  | <0.001 | 3.441 | 1.752 -6.757 | <0.001 |  |
| 1-3            | 1      | (reference)    |        | 1     | (reference)  |        |  |
| <b>Model 3</b> |        |                |        |       |              |        |  |
| IPI            |        |                |        |       |              |        |  |
| >3             | 1.454  | 0.566 -3.734   | 0.436  | 1.309 | 0.592 -2.893 | 0.506  |  |
| ≤3             | 1      | (reference)    |        | 1     | (reference)  |        |  |
| PIT            |        |                |        |       |              |        |  |
| > 1            | 1.836  | 0.798 -4.227   | 0.153  | 1.535 | 0.785 -2.998 | 0.210  |  |
| ≤ 1            | 1      | (reference)    |        | 1     | (reference)  |        |  |
| Interim 5PS    |        |                |        |       |              |        |  |
| 4 or 5         | 10.243 | 4.052 - 25.891 | <0.001 | 3.400 | 1.730 -6.684 | <0.001 |  |
| 1-3            | 1      | (reference)    |        | 1     | (reference)  |        |  |

Supplemental Figure 1

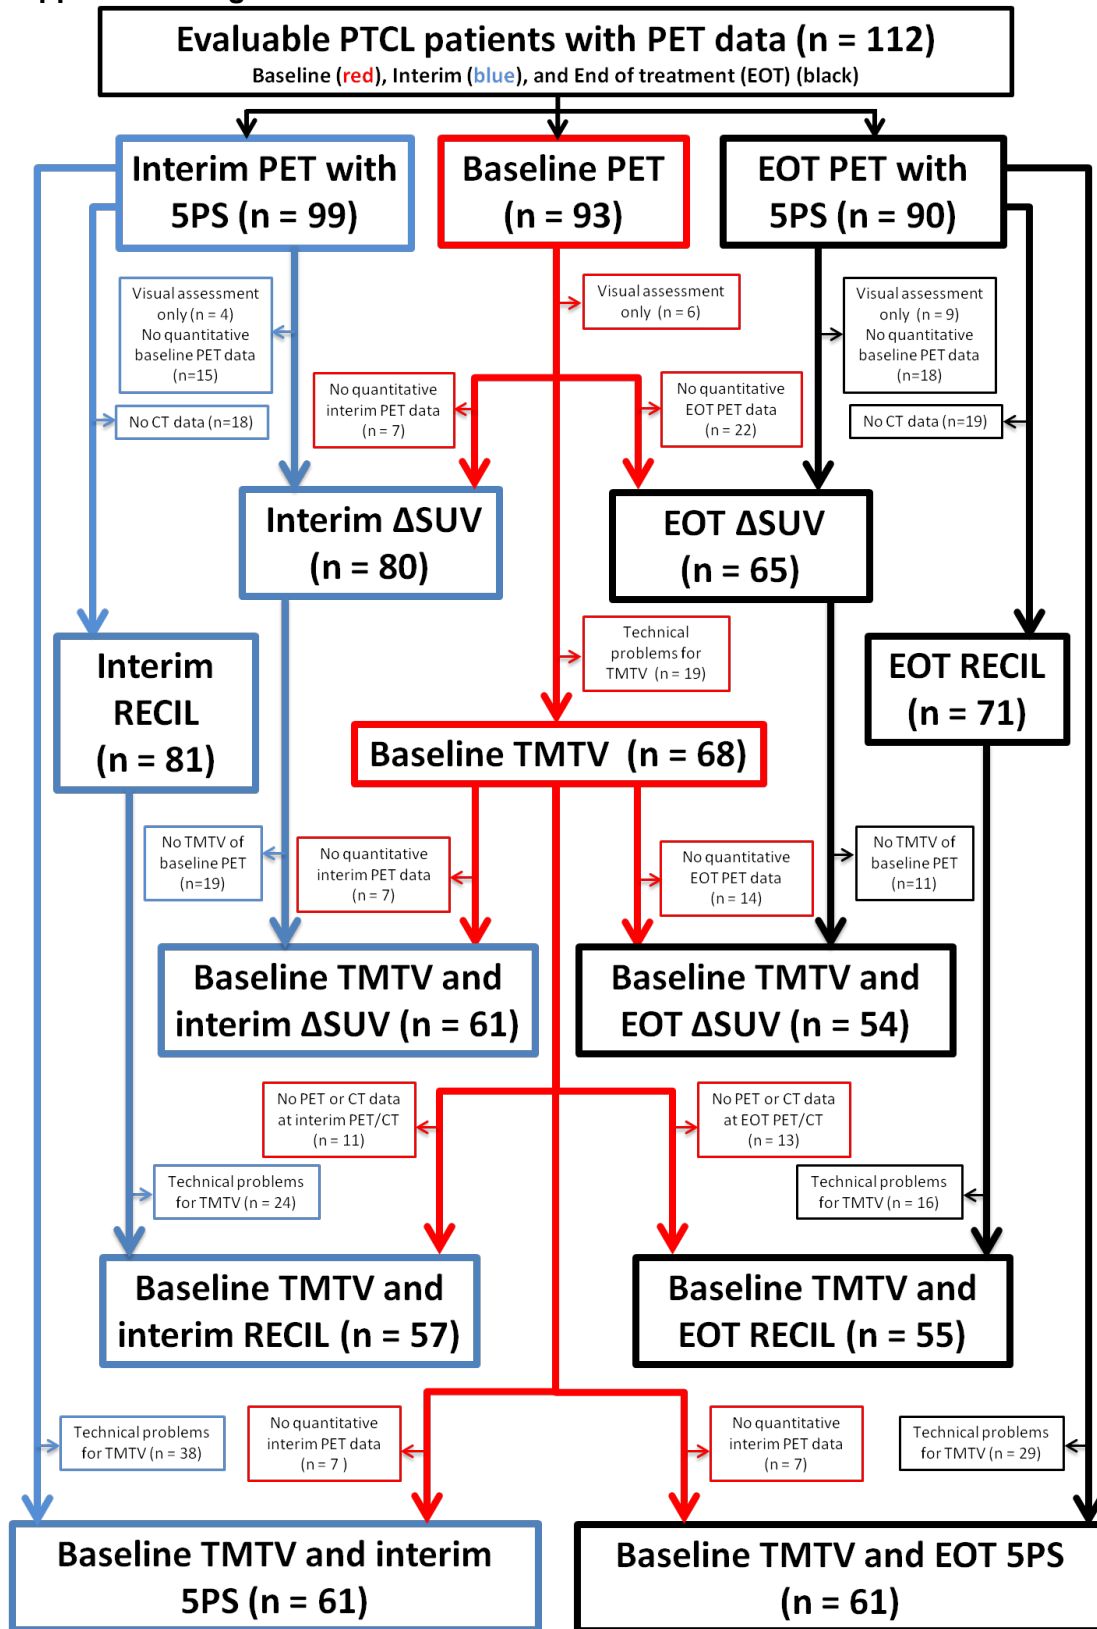

Supplemental Figure 2. Survival curves by interim 5PS and IPI

**A. Interim 5PS and IPI (OS)**

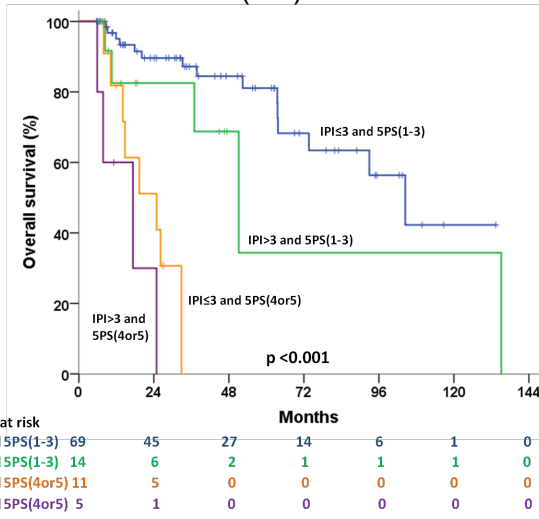

**B. Interim 5PS and IPI (EFS)**

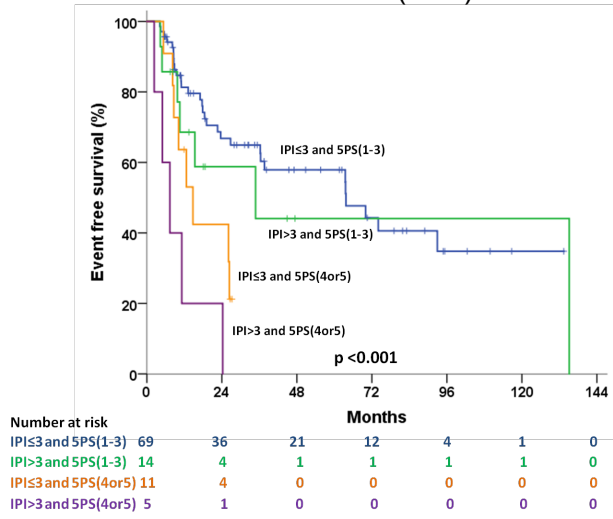

**Supplemental figure 3. Survival curves of interim  $\Delta$ SUV and TMTV**

**A. Interim  $\Delta$ SUV (OS)**

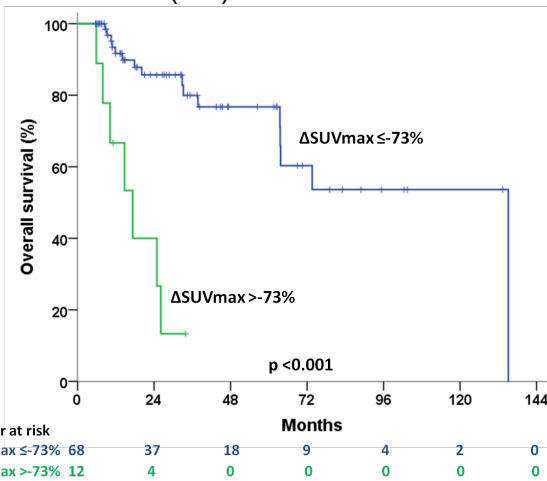

**B. Interim  $\Delta$ SUV (EFS)**

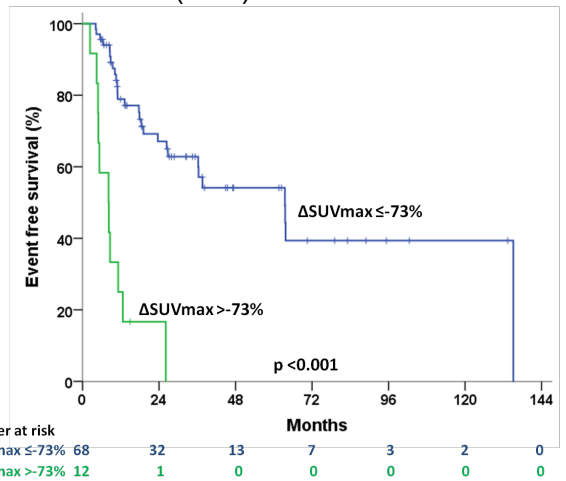

**C. Interim  $\Delta$ SUV and TMTV (OS)**

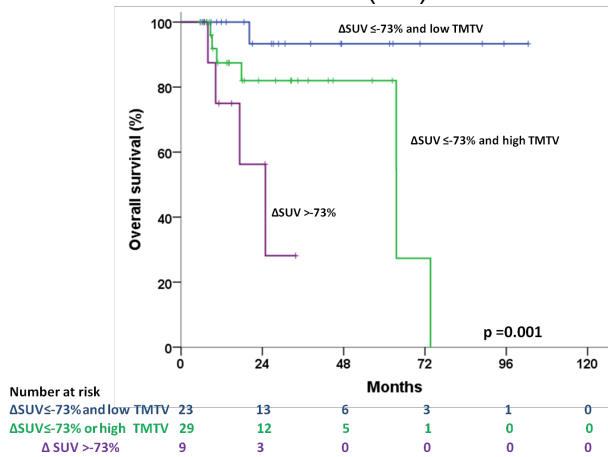

**D. Interim  $\Delta$ SUV and TMTV (EFS)**

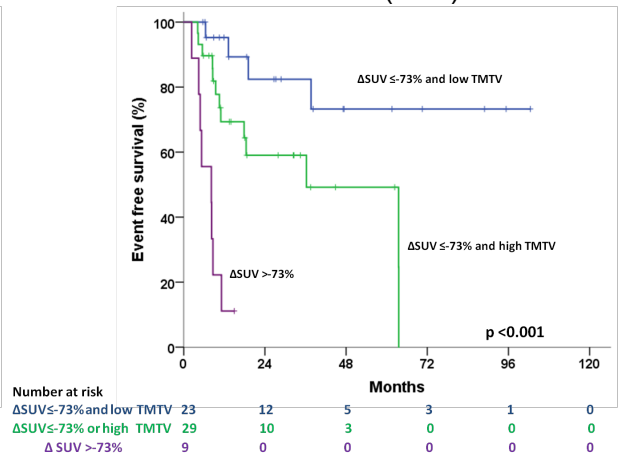

**Supplemental Figure 4. Survival curves of EOT 5PS and clinical indices**

**A. EOT 5PS (OS)**

**B. EOT 5PS (EFS)**

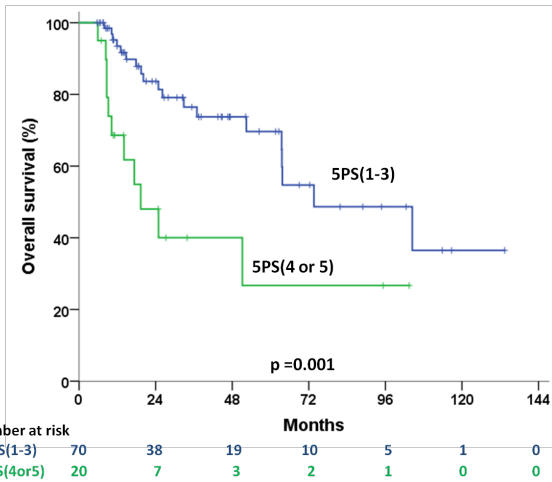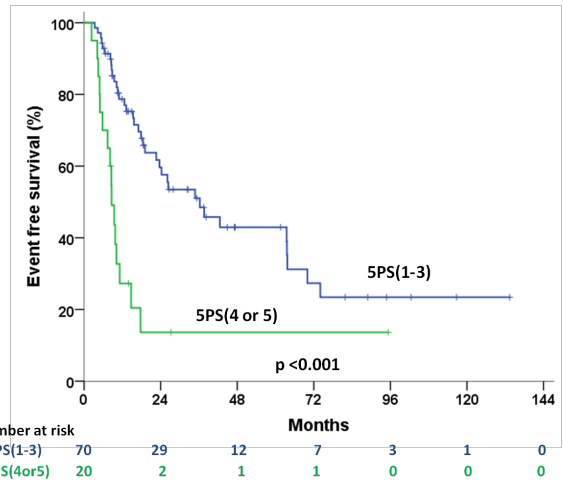

C. EOT 5PS and PIT (OS)

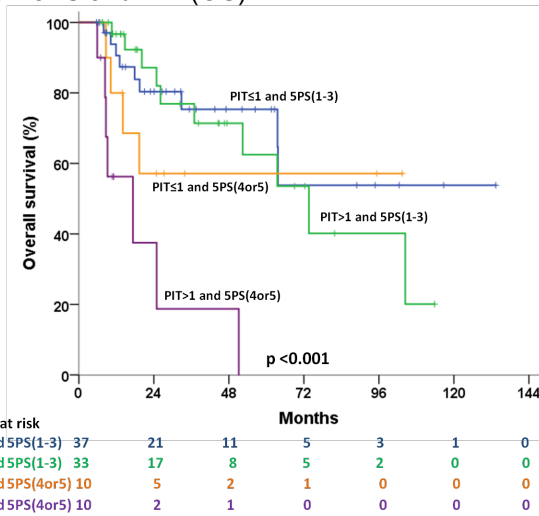

D. EOT 5PS and PIT (EFS)

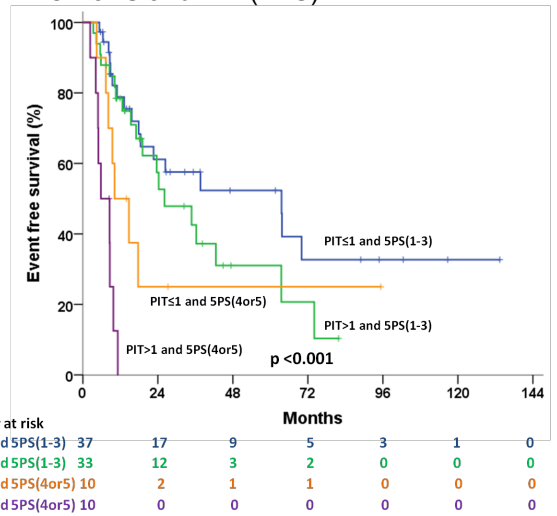

E. EOT 5PS and IPI (OS)

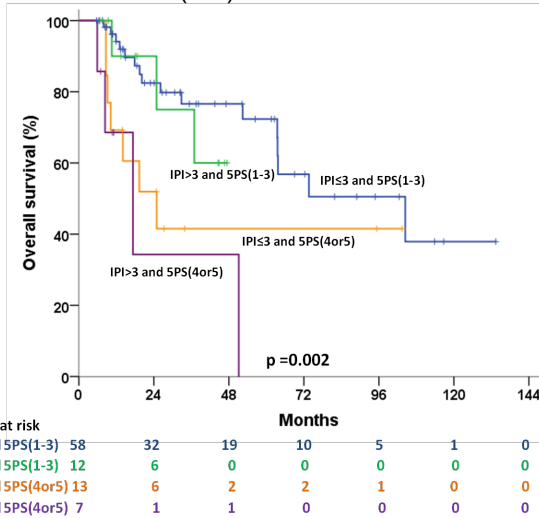

F. EOT 5PS and IPI (EFS)

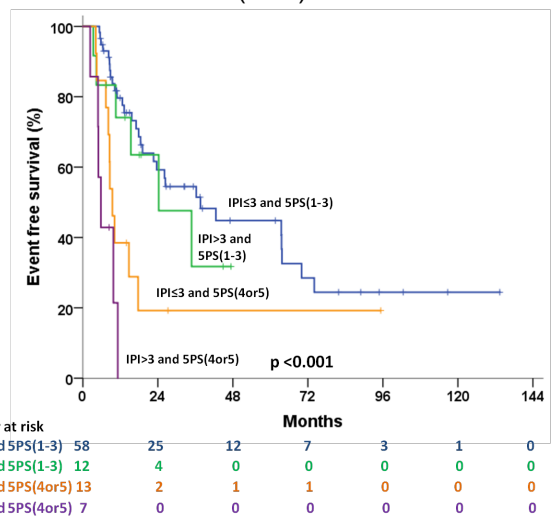

Supplement: ba024075-suppl1.pdf [file ba024075-suppl1.pdf]
